# Supplementary material for: Associations between COVID-19 testing status, non-communicable diseases and HIV status among residents of sub-Saharan Africa during the first wave of the pandemic
Source: Springer Nature journal article supplement (doi:10.1186/s12879-022-07498-w), 2022-06-13
Supplement: MOESM2 [file 23156386]

You are invited to complete an online survey which aims to explore the impact that the COVID-19 outbreak has on the wellness and wellbeing of people. The research is based at the Obafemi Awolowo University Ile-Ife and Lead by Morenike Oluwatoyin Folayan. Ethical approval was obtained from the Human Research Ethics Committee at Institute of Public Health of the Obafemi Awolowo University Ile-Ife, Nigeria (HREC No: IPHOAU/12/1557). The list of co-investigators are found at the end of this consent form.

You have been invited to take part in this project because you are fluent in speaking and understanding the English language, aged 18 years or older and have access to the online survey. Learning from you about how the COVID-19 pandemic has affected the people's wellness and well-being of people of different diversities will help us make recommendations that may improve considerations for people's wellness and well-being in this and future pandemics.

You are under no obligation to take part in this survey. If you would like to participate in the survey, then you are required to answer the questions in the Consent section. This will allow you to access and answer the survey questions. You can end your participation at any time by exiting the survey or closing the web-browser. The withdrawal of any data that you provide is not possible once you have commenced the online survey.

The survey will take about 8-10 minutes to complete the survey. The data collected from the online survey will be kept anonymously and confidentially in a secure setting. It will only be accessed by the research team.

If you are unhappy with any aspects of the research, or if there is a problem, please let us know by contacting

Prof Morenike Oluwatoyin Folayan, Study lead, Obafemi Awolowo University, Ile-Ife, [toyinukpong@yahoo.co.uk](mailto:toyinukpong@yahoo.co.uk)

Dr Brandon Brown, University of California, Riverside School of Medicine, Riverside, California, USA

Dr Annie Nguyen, University of Southern California, Los Angeles, California.

Prof Oliver Ezechi, Nigeria Institute of Medical Research, Nigeria

Prof Benjamin Uzochukwu, University of Nigeria, Enugu Campus, Nigeria

Prof Maha El Tantawi, Alexandria University, Alexandria, Egypt

Dr Nourhan M Aly, Alexandria University, Alexandria, Egypt

## Consent Page

\* 1. I confirm that I am aged 18 years or older

Yes

No

\* 2. I confirm that I have read and have understood the Participant Information Sheet for the current study. I have had the opportunity to consider the information, ask questions and have had these answered satisfactorily

Yes

No

\* 3. I understand that my participation is voluntary and that I am free to end my participation at any time by closing the survey or web-browser without giving any reason.

Yes

No

\* 4. I understand that the withdrawal of any data that I provide is not possible once I have commenced the online survey

Yes

No

\* 5. I agree to take part in this survey

Yes

No

## COVID-19 Information

\* 6. I have tested positive for COVID-19

- Yes  
 No

\* 7. I have experienced the symptoms of COVID-19 (persistent cough or high body temperature or loss of smell) since the outbreak began but I was not tested

- Yes  
 No

\* 8. I have a close friend who tested positive for COVID-19

- Yes  
 No

\* 9. I know someone who died from COVID-19

- Yes  
 No

\* 10. I have had to self-isolate because I have symptoms of COVID-19 before or after the 'lockdown'

- Yes  
 No

\* 11. Have you taken at least one dose of a COVID-19 vaccine?

- Yes  
 No

If your answer to the previous question was **No**, please answer the following two questions

12. Are you willing to receive a COVID-19 vaccine?

- Yes  
 No  
 Unsure

13. What is the reason you have not taken a COVID-19 vaccine? (select all that apply)

- I do not have access because it is not available in my country
- I do not have access because vaccination facilities are very crowded
- I do not have access because I have to wait for my turn for quite some time
- I cannot afford it
- I do not have enough information about the vaccine
- I am concerned the vaccine is not safe
- I am concerned about taking more than one dose
- I am unsure that it will work
- I do not trust the companies making the vaccine
- My religion or beliefs prevent me from taking one
- I have already been infected with COVID-19
- I am at low-risk for COVID-19
- The vaccine side effects match the disease effects
- I do not want to be forced to take the vaccine
- The vaccine is part of governments' plots to control people
- I am taking all the needed precautions so I do not need it
- None of the vaccines are adequately studied; still too early

## Section 1: Socio-demographic Profile

\* 14. In what year were you born?

\* 15. What is your country of residence?

\* 16. What is the highest level of education you completed?

- No formal education                       University  
 Primary                                               Post-graduate  
 Secondary

\* 17. What is your current work status?

- Employed full time                               Unemployed but volunteering  
 Employed part time                               Retired  
 Self-employed                                       Student  
 Unemployed looking for work               Family/Home carer  
 Unemployed not looking for work

\* 18. Are you a healthcare worker?

- Yes  
 No

\* 19. Do you have medical insurance?

- Yes, public insurance  
 Yes, private insurance  
 No

\* 20. Who do you currently live with?

- By myself  
 With a spouse or partner  
 With related family members  
 With people who are not related to me

\* 21. What is your current relationship status?

- Single  Legally married  
 Co-habiting  Divorced/separated  
 Widowed

\* 22. What sex were you assigned at birth? (For example listed on your birth certificate)

- Male  
 Female  
 Intersex  
 Decline to answer

\* 23. What is your current gender?

- Man  Transgender woman/male-to-female  
 Woman  Gender nonconforming  
 Transgender man/female-to-male  Decline to answer  
 Other (Please specify)

\* 24. What is your sexual orientation?

- Straight or heterosexual  
 Lesbian or gay  
 Bisexual  
 Decline to answer  
 Other (please specify)

\* 25. Do you engage in any of the following behaviors? (choose all that applies)

- Engage in transactional sex  
 Use illegal drugs  
 Use prescription drugs without a prescription  
 Inject drugs using a needle  
 Not applicable

## Section 2: Medical Health Status

\* 26. Please indicate if you have any of the following conditions (check all that apply)

- |                                                                                                        |                                                                                                       |
|--------------------------------------------------------------------------------------------------------|-------------------------------------------------------------------------------------------------------|
| <input type="checkbox"/> None                                                                          | <input type="checkbox"/> High blood pressure                                                          |
| <input type="checkbox"/> Anxiety                                                                       | <input type="checkbox"/> HIV                                                                          |
| <input type="checkbox"/> Arthritis                                                                     | <input type="checkbox"/> Kidney conditions                                                            |
| <input type="checkbox"/> Asthma                                                                        | <input type="checkbox"/> Malaria                                                                      |
| <input type="checkbox"/> Broken bones or fractures                                                     | <input type="checkbox"/> Migraines                                                                    |
| <input type="checkbox"/> Cancer                                                                        | <input type="checkbox"/> Neurological problems                                                        |
| <input type="checkbox"/> Depression                                                                    | <input type="checkbox"/> Pneumonia                                                                    |
| <input type="checkbox"/> Dermatological problems                                                       | <input type="checkbox"/> Respiratory problems                                                         |
| <input type="checkbox"/> Diabetes                                                                      | <input type="checkbox"/> Severe allergy                                                               |
| <input type="checkbox"/> Difficulty eating, bathing, dressing, toileting, or moving around by yourself | <input type="checkbox"/> Shingles - Herpes Zoster                                                     |
| <input type="checkbox"/> Hearing loss                                                                  | <input type="checkbox"/> STI (sexually transmitted infections such as gonorrhea, syphilis, chlamydia) |
| <input type="checkbox"/> Heart condition                                                               | <input type="checkbox"/> Stroke                                                                       |
| <input type="checkbox"/> Hepatitis                                                                     | <input type="checkbox"/> Urinary tract infections                                                     |
| <input type="checkbox"/> Herpes - Herpes simplex                                                       | <input type="checkbox"/> Vision loss                                                                  |
| <input type="checkbox"/> (Others) Please specify                                                       |                                                                                                       |

\* 27. As compared to 5 years ago, how would you describe your ability to perform the following tasks involving your memory?

|                                                                                                                   | Much better now       | Somewhat better now   | About the same        | Somewhat poorer now   | Much poorer now       |
|-------------------------------------------------------------------------------------------------------------------|-----------------------|-----------------------|-----------------------|-----------------------|-----------------------|
| Remembering the name of the person just introduced to you                                                         | <input type="radio"/> | <input type="radio"/> | <input type="radio"/> | <input type="radio"/> | <input type="radio"/> |
| Recalling a radio/television station or zip code number that you use on a daily or weekly basis                   | <input type="radio"/> | <input type="radio"/> | <input type="radio"/> | <input type="radio"/> | <input type="radio"/> |
| Recalling where you have put objects (such as keys) in your home                                                  | <input type="radio"/> | <input type="radio"/> | <input type="radio"/> | <input type="radio"/> | <input type="radio"/> |
| Remembering specific facts from an internet article, newspaper or magazine article you have just finished reading | <input type="radio"/> | <input type="radio"/> | <input type="radio"/> | <input type="radio"/> | <input type="radio"/> |
| Remembering the items you intended to buy when you arrive at a shop or pharmacy                                   | <input type="radio"/> | <input type="radio"/> | <input type="radio"/> | <input type="radio"/> | <input type="radio"/> |
| In general, how would you describe your memory as compared to 5 years ago?                                        | <input type="radio"/> | <input type="radio"/> | <input type="radio"/> | <input type="radio"/> | <input type="radio"/> |



### Section 3: Pandemic Stress Index

Many countries issued a complete or partial restricted movement order in response to the COVID-19 (coronavirus) pandemic. The following questions are about the time period that these orders were in place.

\* 28. Which of the following are you doing during COVID-19 ? (check all that apply)

- I made no changes to my life or behavior
- Practicing physical distancing (i.e., reducing physical contact with other people in social, work, or school settings by avoiding large groups and staying 6 feet away from other people)
- Isolating or quarantining myself (i.e., because you were sick, or you were exposed to coronavirus and separated yourself from other people to prevent others from getting it)
- Wearing masks or face coverings
- Washing my hands or sanitizing my hands more often
- Caring for someone at home
- Working from home
- Volunteering my time, skills, resources, or donating money to help fight COVID-19
- Following media coverage related to COVID-19 (e.g., watching or reading the news, following social media coverage, etc.)
- Change in work status
- Change in use of healthcare services
- Change in travel plans

\* 29. How much did COVID-19 impact your day-to-day life?

- Extremely
- Very much
- Much
- A little
- Not at all

\* 30. Which of the following are you experiencing during this COVID-19 period? (check all that apply)

- |                                                                                                                                                                                             |                                                                                                                                         |
|---------------------------------------------------------------------------------------------------------------------------------------------------------------------------------------------|-----------------------------------------------------------------------------------------------------------------------------------------|
| <input type="checkbox"/> I have been diagnosed with COVID-19                                                                                                                                | <input type="checkbox"/> Change in sleep patterns (sleeping more, sleeping less, or other changes from usual)                           |
| <input type="checkbox"/> Fear of getting COVID-19                                                                                                                                           | <input type="checkbox"/> Confusion about what COVID-19 is, how to prevent it, or why social distancing/isolation/quarantines are needed |
| <input type="checkbox"/> Fear of giving COVID-19 to someone else                                                                                                                            | <input type="checkbox"/> Feeling that I was contributing to the greater good by preventing myself or others from getting COVID-19       |
| <input type="checkbox"/> Worrying about people other than me (friends, family, partners, etc.)                                                                                              | <input type="checkbox"/> Not getting enough emotional or social support from family, friends, partners, a counselor, or someone else    |
| <input type="checkbox"/> Stigma or discrimination from other people (e.g., people treating you differently because of your identity, having symptoms, or other factors related to COVID-19) | <input type="checkbox"/> Not getting enough financial support from family, friends, partners, an organization, or someone else          |
| <input type="checkbox"/> Frustration or boredom                                                                                                                                             | <input type="checkbox"/> Not getting enough exercise                                                                                    |
| <input type="checkbox"/> Anxiety                                                                                                                                                            | <input type="checkbox"/> Confusion about where to get true and accurate information about COVID-19                                      |
| <input type="checkbox"/> Depression                                                                                                                                                         | <input type="checkbox"/> Difficulty obtaining a mask or face covering                                                                   |
| <input type="checkbox"/> Loneliness                                                                                                                                                         | <input type="checkbox"/> Difficulty washing my hands as often as recommended                                                            |
| <input type="checkbox"/> Anger                                                                                                                                                              | <input type="checkbox"/> None of the above                                                                                              |
| <input type="checkbox"/> Grief or feelings of loss                                                                                                                                          |                                                                                                                                         |

\* 31. Over the last 7 days, how often have you been bothered by the following problems:

|                                                     | Not at all            | Several days          | More than half the days | Nearly every day      |
|-----------------------------------------------------|-----------------------|-----------------------|-------------------------|-----------------------|
| Having little interest or pleasure in doing things? | <input type="radio"/> | <input type="radio"/> | <input type="radio"/>   | <input type="radio"/> |
| Feeling down, depressed, or hopeless?               | <input type="radio"/> | <input type="radio"/> | <input type="radio"/>   | <input type="radio"/> |
| Feeling nervous, anxious, or on edge?               | <input type="radio"/> | <input type="radio"/> | <input type="radio"/>   | <input type="radio"/> |
| Not being able to stop or control worrying?         | <input type="radio"/> | <input type="radio"/> | <input type="radio"/>   | <input type="radio"/> |

\* 32. In the past 6 months, how often have you thought about taking your own life

- Never
- Seldom
- Very often
- All the time

If you are thinking about suicide, be sure to talk to other people about it. They can be friends or family members but they do not have to be. It can be difficult to talk about this topic with people close to you. What is important is that you talk to someone. You can do this by phone, chat, email or in person.

### Section 3: Pandemic Stress Index

\* 33. What kind of "Change in work status" did you face?

- Work was laid off
- Reduced working hours
- Increased working hours
- Other (Please specify)

\* 34. In case of "Change in use of healthcare services". Was this an increase or decrease in use of services?

- Increase
- Decrease

\* 35. What kind of "Change in travel plans" did you face?

- Cancelled travel plans
- Scheduling more travel plans
- Others (Please specify)

## Section 4: Finance and Lifestyle

\* 36. Have you experienced a change in...

|                                                                                            | Increase              | Decrease              | No change             | Not applicable        |
|--------------------------------------------------------------------------------------------|-----------------------|-----------------------|-----------------------|-----------------------|
| Sexual activity                                                                            | <input type="radio"/> | <input type="radio"/> | <input type="radio"/> | <input type="radio"/> |
| Tobacco use                                                                                | <input type="radio"/> | <input type="radio"/> | <input type="radio"/> | <input type="radio"/> |
| Alcohol use                                                                                | <input type="radio"/> | <input type="radio"/> | <input type="radio"/> | <input type="radio"/> |
| Marijuana use                                                                              | <input type="radio"/> | <input type="radio"/> | <input type="radio"/> | <input type="radio"/> |
| Other substance use                                                                        | <input type="radio"/> | <input type="radio"/> | <input type="radio"/> | <input type="radio"/> |
| Food intake                                                                                | <input type="radio"/> | <input type="radio"/> | <input type="radio"/> | <input type="radio"/> |
| Use of screens<br>[computers, smart<br>phones: Internet<br>addiction and gaming<br>mostly] | <input type="radio"/> | <input type="radio"/> | <input type="radio"/> | <input type="radio"/> |

\* 37. Have you experienced a financial loss because of the COVID-19 pandemic?

- Yes
- No
- Not sure

## Section 4: Finance and Lifestyle

\* 38. What financial losses have you experienced because of the COVID-19 pandemic? (check all that apply)

- Job loss or laid off
- Lost or reduced wages
- Investment/retirement loss
- Travel-related cancellations that were not refunded
- Other (Please specify)

\* 39. Has the COVID-19 pandemic led to any of the following?

|                                                                                                    | Yes                   | No                    |
|----------------------------------------------------------------------------------------------------|-----------------------|-----------------------|
| Having to spend more time taking care of partners or other family members                          | <input type="radio"/> | <input type="radio"/> |
| Loss of other sources of financial support by you or a member of your household                    | <input type="radio"/> | <input type="radio"/> |
| Loss of your housing, or becoming homeless                                                         | <input type="radio"/> | <input type="radio"/> |
| Difficulty paying for basic needs, including food, clothing, shelter, electricity, utilities, etc. | <input type="radio"/> | <input type="radio"/> |
| Did you worry about whether food would run out before getting money to buy more?                   | <input type="radio"/> | <input type="radio"/> |
| Did you ever cut the size of your meals or skip meals because there wasn't enough money for food?  | <input type="radio"/> | <input type="radio"/> |
| Were you ever hungry but didn't eat because there wasn't enough money for food?                    | <input type="radio"/> | <input type="radio"/> |
| Unable to attend a healthcare providers appointment                                                | <input type="radio"/> | <input type="radio"/> |
| Unable to obtain medications that you take                                                         | <input type="radio"/> | <input type="radio"/> |
| Unable to afford medical care                                                                      | <input type="radio"/> | <input type="radio"/> |

## Section 4: Finance and Lifestyle

\* 40. Did your toothbrushing frequency change?

- Yes, increased
- Yes, decreased
- No, did not change

\* 41. Did you have mouth ulcers during the lockdown?

- Yes
- No

\* 42. Did you have critical medical need during the COVID-19 Pandemic?

- Yes
- No
- No response

\* 43. Did you have challenges accessing usual medical health care services?

- Yes
- No
- No response
- Not applicable

\* 44. Did you have to resort to alternative medical care services to address your health needs?

- Yes
- No
- No response
- Not applicable

\* 45. Did you have a healthcare provider appointment at any time during the COVID-19 pandemic that you were not able to attend?

- Yes
- No
- I did not have a healthcare provider appointment during COVID-19

## Section 4: Finance and Lifestyle

\* 46. What were the reasons that made you unable to attend a healthcare provider's appointment? (check all that apply)

- |                                                                                 |                                                                                |
|---------------------------------------------------------------------------------|--------------------------------------------------------------------------------|
| <input type="checkbox"/> My clinic cancelled my appointment because of COVID-19 | <input type="checkbox"/> Hours/location was inconvenient                       |
| <input type="checkbox"/> I had symptoms of coronavirus so did not go            | <input type="checkbox"/> I forgot to go/missed my appointment                  |
| <input type="checkbox"/> I felt good so did not need to go                      | <input type="checkbox"/> I felt disrespected by the office or medical staff    |
| <input type="checkbox"/> Didn't have the money or insurance                     | <input type="checkbox"/> I had difficulty getting transportation to the clinic |
| <input type="checkbox"/> Other (Please specify)                                 |                                                                                |



## Section 4: Finance and Lifestyle

\* 47. How much has the COVID-19 pandemic interrupted the care you receive for your mental health? (e.g., counselor, therapist, support groups?)

- I don't receive mental health care
- Not at all
- Somewhat
- A lot

\* 48. How much has the COVID-19 pandemic interrupted the care you receive for substance abuse addiction?

- I don't receive substance abuse addiction care
- Not at all
- Somewhat
- A lot

\* 49. If you used any healthcare service at all during the COVID-19 pandemic, how did you meet your provider? (Check all that apply)

- In-person visit
- Telehealth with video
- Over the phone (no video)
- Email or written communication (e.g., through a patient portal)
- Not applicable

## Section 5: Psychosocial Support

\* 50. On a scale from 1 (lowest) to 10 (highest), how socially isolated do you feel right now?

0 10

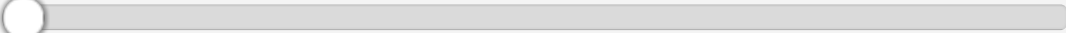

\* 51. Compared to your life before COVID-19, do you feel...

- More socially isolated
- Less socially isolated
- About the same/ no change

\* 52. How much difficulty have you had following the recommendations for keeping away from close contact with people during COVID-19?

- None
- A little
- Moderate
- A lot

\* 53. How has the quality of the relationships between you and members of your family changed?

- |                                      |                                       |
|--------------------------------------|---------------------------------------|
| <input type="radio"/> A lot worse    | <input type="radio"/> A little better |
| <input type="radio"/> A little worse | <input type="radio"/> A lot better    |
| <input type="radio"/> About the same | <input type="radio"/> Not applicable  |

\* 54. How has the quality of the relationships between you and your significant other changed?

- |                                      |                                       |
|--------------------------------------|---------------------------------------|
| <input type="radio"/> A lot worse    | <input type="radio"/> A little better |
| <input type="radio"/> A little worse | <input type="radio"/> A lot better    |
| <input type="radio"/> About the same | <input type="radio"/> Not applicable  |

\* 55. How has the quality of the relationships with your friends changed?

- |                                      |                                       |
|--------------------------------------|---------------------------------------|
| <input type="radio"/> A lot worse    | <input type="radio"/> A little better |
| <input type="radio"/> A little worse | <input type="radio"/> A lot better    |
| <input type="radio"/> About the same | <input type="radio"/> Not applicable  |

## Section 6: Post-Traumatic Stress Disorder

\* 56. Below is a list of problems and complaints that people sometimes have in response to stressful life experiences. Please read each one carefully, then check off to the right to indicate how much you have been bothered by that problem in the past month.

|                                                                                                                                                    | Not at all            | A little bit          | Moderately            | Quite a bit           | Extremely             |
|----------------------------------------------------------------------------------------------------------------------------------------------------|-----------------------|-----------------------|-----------------------|-----------------------|-----------------------|
| Repeated, disturbing memories, thoughts, or images of a stressful experience from the past?                                                        | <input type="radio"/> | <input type="radio"/> | <input type="radio"/> | <input type="radio"/> | <input type="radio"/> |
| Repeated, disturbing dreams of a stressful experience from the past?                                                                               | <input type="radio"/> | <input type="radio"/> | <input type="radio"/> | <input type="radio"/> | <input type="radio"/> |
| Suddenly acting or feeling as if a stressful experience were happening again (as if you were reliving it)?                                         | <input type="radio"/> | <input type="radio"/> | <input type="radio"/> | <input type="radio"/> | <input type="radio"/> |
| Feeling very upset when something reminded you of a stressful experience from the past?                                                            | <input type="radio"/> | <input type="radio"/> | <input type="radio"/> | <input type="radio"/> | <input type="radio"/> |
| Having physical reactions (e.g., heart pounding, trouble breathing, sweating) when something reminded you of a stressful experience from the past? | <input type="radio"/> | <input type="radio"/> | <input type="radio"/> | <input type="radio"/> | <input type="radio"/> |
| Avoiding thinking about or talking about a stressful experience from the past or avoiding having feelings related to it?                           | <input type="radio"/> | <input type="radio"/> | <input type="radio"/> | <input type="radio"/> | <input type="radio"/> |
| Avoiding activities or situations because they reminded you of a stressful experience from the past?                                               | <input type="radio"/> | <input type="radio"/> | <input type="radio"/> | <input type="radio"/> | <input type="radio"/> |
| Trouble remembering important parts of a stressful experience from the past?                                                                       | <input type="radio"/> | <input type="radio"/> | <input type="radio"/> | <input type="radio"/> | <input type="radio"/> |

|                                                                                          | Not at all            | A little bit          | Moderately            | Quite a bit           | Extremely             |
|------------------------------------------------------------------------------------------|-----------------------|-----------------------|-----------------------|-----------------------|-----------------------|
| Loss of interest in activities that you used to enjoy?                                   | <input type="radio"/> | <input type="radio"/> | <input type="radio"/> | <input type="radio"/> | <input type="radio"/> |
| Feeling distant or cut off from other people?                                            | <input type="radio"/> | <input type="radio"/> | <input type="radio"/> | <input type="radio"/> | <input type="radio"/> |
| Feeling emotional, numb, or being unable to have loving feelings for those close to you? | <input type="radio"/> | <input type="radio"/> | <input type="radio"/> | <input type="radio"/> | <input type="radio"/> |
| Feeling as if your future will somehow be cut short?                                     | <input type="radio"/> | <input type="radio"/> | <input type="radio"/> | <input type="radio"/> | <input type="radio"/> |
| Trouble falling or staying asleep?                                                       | <input type="radio"/> | <input type="radio"/> | <input type="radio"/> | <input type="radio"/> | <input type="radio"/> |
| Feeling irritable or having angry outbursts?                                             | <input type="radio"/> | <input type="radio"/> | <input type="radio"/> | <input type="radio"/> | <input type="radio"/> |
| Having difficulty concentrating?                                                         | <input type="radio"/> | <input type="radio"/> | <input type="radio"/> | <input type="radio"/> | <input type="radio"/> |
| Being "super-alert" or watchful or on guard?                                             | <input type="radio"/> | <input type="radio"/> | <input type="radio"/> | <input type="radio"/> | <input type="radio"/> |
| Feeling jumpy or easily startled?                                                        | <input type="radio"/> | <input type="radio"/> | <input type="radio"/> | <input type="radio"/> | <input type="radio"/> |

## Section 7: Coping

\* 57. These items deal with ways you have been coping with the stress in your life since the onset of the COVID-19 pandemic. Consider how well the following statements describe your behavior and actions.

|                                                                              | Does not describe<br>me at all | Does not describe<br>me | Neutral               | Describes me          | Describes me very<br>well |
|------------------------------------------------------------------------------|--------------------------------|-------------------------|-----------------------|-----------------------|---------------------------|
| I look for creative ways to alter difficult situations.                      | <input type="radio"/>          | <input type="radio"/>   | <input type="radio"/> | <input type="radio"/> | <input type="radio"/>     |
| Regardless of what happens to me, I believe I can control my reaction to it. | <input type="radio"/>          | <input type="radio"/>   | <input type="radio"/> | <input type="radio"/> | <input type="radio"/>     |
| I believe I can grow in positive ways by dealing with difficult situations.  | <input type="radio"/>          | <input type="radio"/>   | <input type="radio"/> | <input type="radio"/> | <input type="radio"/>     |

## Section 8: Self Care

\* 58. What are the things you have done to take care of your mental health during the COVID-19 pandemic?  
(select all that apply)

- |                                                                                                                          |                                                                                                        |
|--------------------------------------------------------------------------------------------------------------------------|--------------------------------------------------------------------------------------------------------|
| <input type="checkbox"/> Talk to friends or family on the phone                                                          | <input type="checkbox"/> Exercise or spend leisure time outdoors like at a park or walking trail       |
| <input type="checkbox"/> Talk to friends or family through videochat (Facetime, Skype, Zoom, Line, WhatsApp, Viber etc.) | <input type="checkbox"/> Do yardwork or gardening                                                      |
| <input type="checkbox"/> Talk to friends or family face to face, in person                                               | <input type="checkbox"/> Participate in creative activities or hobbies (writing, reading, art, crafts) |
| <input type="checkbox"/> Spend time with pets                                                                            | <input type="checkbox"/> Learn a new skill or engage in distant learning                               |
| <input type="checkbox"/> Meditate or other mindfulness practices                                                         | <input type="checkbox"/> Taking breaks from the news or social media                                   |
| <input type="checkbox"/> Exercise in or around your home                                                                 |                                                                                                        |
| <input type="checkbox"/> Other (Please specify)                                                                          |                                                                                                        |

\* 59. How did you learn about this study?

- Facebook
- WhatsApp
- Twitter
- LinkedIn
- Website
- Personal invitation

Other (please specify)

60. Are there other challenges you have faced during the COVID-19 pandemic that we did not ask about?

61. Are there other strengths or resiliencies that you have tapped into that we did not ask about? Please describe here:

## Section 9: For People Living with HIV

\* 62. What was the year of your first HIV positive test?

\* 63. What is your viral load?

- Detectable
- Undetectable
- Do not know

64. If you know your viral load, how many copies per ml? (e.g., 20 copies/mL)

\* 65. What was your most recent CD4 count?

- Less than 200
- Between 200 and 500
- More than 500
- Do not know

\* 66. What was the lowest CD4 count you've ever had (nadir CD4)?

- Less than 200
- Between 200 and 500
- More than 500
- Do not know

\* 67. At this moment, do you have a 90-day supply of your HIV medications?

- Yes
- No

\* 68. Did you have difficulty obtaining a 90-day supply of HIV medications during COVID-19?

- Yes
- No

\* 69. Some people find that they sometimes forget to take their medications to manage their HIV. Did you miss any of your HIV medications during COVID-19?

Yes

No



## Section 9: For People Living with HIV

\* 70. What are the reasons you did not take your HIV medications? (select all that apply)

- |                                                                                                                   |                                                                                |
|-------------------------------------------------------------------------------------------------------------------|--------------------------------------------------------------------------------|
| <input type="checkbox"/> Could not get my HIV medications because pharmacy was closed or because of the shutdowns | <input type="checkbox"/> Worried about side effects                            |
| <input type="checkbox"/> Wanted to ration my medication to make it last during the shutdowns                      | <input type="checkbox"/> Don't have money or insurance to get medicine         |
| <input type="checkbox"/> Felt good, did not need them                                                             | <input type="checkbox"/> Drinking or using drugs and did not want interactions |
| <input type="checkbox"/> CD4 count and viral load are good                                                        | <input type="checkbox"/> I just recently found out I was HIV positive          |
| <input type="checkbox"/> Doctor advised me to delay treatment                                                     | <input type="checkbox"/> I forgot to take them                                 |
| <input type="checkbox"/> Don't want to think about being HIV positive                                             |                                                                                |
| <input type="checkbox"/> Other (Please specify)                                                                   |                                                                                |

71. Thank you for taking this survey.

If you will like us to contact you with the publications associated with this study, please provide me your email address

**The Survey Code is:** KXJK-87XB-UZKU
